# Supplementary material for: The immune infiltration in clear cell Renal Cell Carcinoma and their clinical implications: A study based on TCGA and GEO databases
Source: PubMed Central journal article supplement (PMC7097965; doi:10.7150/jca.37285), 2020-03-05
Supplement: jcav11p3207s1.pdf [file jcav11p3207s1.pdf]

**Supplementary table 1. Corresponding information of 583 enrolled patients**

| <b>ID</b>               | <b>Time(days)</b> | <b>State</b> | <b>age</b> | <b>gender</b> | <b>grade</b> | <b>stage</b> | <b>T</b> | <b>M</b> | <b>N</b> |
|-------------------------|-------------------|--------------|------------|---------------|--------------|--------------|----------|----------|----------|
| <b>TCGA-6D-AA2E-01A</b> | 362               | 0            | 68         | FEMALE        | G2           | Stage I      | T1b      | MX       | NX       |
| <b>TCGA-A3-3306-01A</b> | 1120              | 0            | 67         | MALE          | G3           | Stage I      | T1b      | M0       | N0       |
| <b>TCGA-A3-3307-01A</b> | 1436              | 0            | 66         | MALE          | G3           | Stage III    | T3b      | M0       | N0       |
| <b>TCGA-A3-3308-01A</b> | 16                | 0            | 77         | FEMALE        | G2           | Stage III    | T3b      | M0       | N0       |
| <b>TCGA-A3-3316-01A</b> | 1493              | 0            | 57         | MALE          | G3           | Stage II     | T2       | M0       | NX       |
| <b>TCGA-A3-3317-01A</b> | 1491              | 0            | 67         | MALE          | G2           | Stage II     | T2       | M0       | N0       |
| <b>TCGA-A3-3319-01A</b> | 1130              | 0            | 70         | MALE          | G2           | Stage I      | T1b      | M0       | NX       |
| <b>TCGA-A3-3322-01A</b> | 1478              | 0            | 51         | MALE          | G2           | Stage I      | T1a      | M0       | NX       |
| <b>TCGA-A3-3323-01A</b> | 1106              | 0            | 53         | MALE          | G1           | Stage I      | T1b      | M0       | NX       |
| <b>TCGA-A3-3324-01A</b> | 1186              | 0            | 51         | MALE          | G3           | Stage I      | T1b      | M0       | NX       |
| <b>TCGA-A3-3325-01A</b> | 1170              | 1            | 52         | MALE          | G2           | Stage I      | T1a      | M0       | NX       |

|                         |      |   |    |        |    |           |     |    |    |
|-------------------------|------|---|----|--------|----|-----------|-----|----|----|
| <b>TCGA-A3-3326-01A</b> | 1137 | 0 | 47 | MALE   | G1 | Stage I   | T1a | M0 | NX |
| <b>TCGA-A3-3329-01A</b> | 1624 | 0 | 75 | MALE   | G2 | Stage I   | T1b | M0 | N0 |
| <b>TCGA-A3-3331-01A</b> | 1257 | 0 | 86 | FEMALE | G2 | Stage I   | T1  | M0 | N0 |
| <b>TCGA-A3-3343-01A</b> | 945  | 0 | 79 | MALE   | G3 | Stage II  | T2  | M0 | N0 |
| <b>TCGA-A3-3346-01A</b> | 137  | 1 | 68 | MALE   | G3 | Stage I   | T1b | M0 | NX |
| <b>TCGA-A3-3347-01A</b> | 1610 | 1 | 76 | FEMALE | G2 | Stage III | T1b | M0 | N1 |
| <b>TCGA-A3-3349-01A</b> | 1385 | 0 | 34 | FEMALE | G2 | Stage I   | T1b | M0 | N0 |
| <b>TCGA-A3-3351-01A</b> | 910  | 0 | 42 | MALE   | G2 | Stage II  | T2a | M0 | N0 |
| <b>TCGA-A3-3357-01A</b> | 2688 | 0 | 62 | MALE   | G3 | Stage II  | T2  | M0 | N0 |
| <b>TCGA-A3-3358-01A</b> | 1307 | 0 | 57 | FEMALE | G2 | Stage I   | T1a | M0 | N0 |
| <b>TCGA-A3-3359-01A</b> | 2504 | 0 | 82 | FEMALE | G2 | Stage I   | T1a | M0 | N0 |
| <b>TCGA-A3-3362-01A</b> | 1559 | 0 | 60 | FEMALE | G2 | Stage I   | T1a | M0 | N0 |
| <b>TCGA-A3-3363-01A</b> | 319  | 0 | 50 | MALE   | G2 | Stage II  | T2  | M0 | N0 |

|                         |      |   |    |        |    |           |     |    |    |
|-------------------------|------|---|----|--------|----|-----------|-----|----|----|
| <b>TCGA-A3-3365-01A</b> | 873  | 0 | 46 | MALE   | G2 | Stage I   | T1a | M0 | NX |
| <b>TCGA-A3-3370-01A</b> | 2274 | 0 | 48 | FEMALE | G2 | Stage I   | T1b | M0 | N0 |
| <b>TCGA-A3-3372-01A</b> | 735  | 0 | 64 | MALE   | G2 | Stage III | T3  | M0 | NX |
| <b>TCGA-A3-3373-01A</b> | 1621 | 0 | 54 | FEMALE | G3 | Stage I   | T1b | M0 | N0 |
| <b>TCGA-A3-3374-01A</b> | 1314 | 0 | 51 | FEMALE | G2 | Stage I   | T1b | M0 | N0 |
| <b>TCGA-A3-3376-01A</b> | 1696 | 1 | 51 | MALE   | G2 | Stage I   | T1a | M0 | N0 |
| <b>TCGA-A3-3378-01A</b> | 630  | 0 | 60 | MALE   | G3 | Stage I   | T1  | M0 | N0 |
| <b>TCGA-A3-3380-01A</b> | 567  | 0 | 54 | MALE   | G2 | Stage I   | T1  | M0 | N0 |
| <b>TCGA-A3-3382-01A</b> | 574  | 0 | 69 | MALE   | G3 | Stage I   | T1b | M0 | NX |
| <b>TCGA-A3-3387-01A</b> | 617  | 0 | 49 | MALE   | G2 | Stage I   | T1a | M0 | N0 |
| <b>TCGA-A3-A6NJ-01A</b> | 468  | 0 | 57 | FEMALE | G1 | Stage I   | T1a | MX | NX |
| <b>TCGA-A3-A6NL-01A</b> | 689  | 0 | 49 | FEMALE | G2 | Stage I   | T1b | MX | NX |
| <b>TCGA-A3-A6NN-01A</b> | 3    | 0 | 78 | MALE   | G2 | Stage I   | T1a | MX | NX |

|                         |      |   |    |        |    |           |     |    |    |
|-------------------------|------|---|----|--------|----|-----------|-----|----|----|
| <b>TCGA-A3-A8OU-01A</b> | 0    | 0 | 74 | FEMALE | G1 | Stage I   | T1a | MX | NX |
| <b>TCGA-A3-A8OW-01A</b> | 323  | 0 | 37 | MALE   | G2 | Stage III | T3a | MX | NX |
| <b>TCGA-A3-A8OX-01A</b> | 0    | 0 | 65 | FEMALE | G3 | Stage I   | T1a | MX | NX |
| <b>TCGA-AK-3425-01A</b> | 3343 | 0 | 68 | MALE   | G2 | Stage I   | T1  | M0 | N0 |
| <b>TCGA-AK-3426-01A</b> | 885  | 1 | 37 | MALE   | G3 | Stage III | T3a | M0 | N1 |
| <b>TCGA-AK-3428-01A</b> | 2223 | 0 | 62 | MALE   | G2 | Stage III | T3b | M0 | N0 |
| <b>TCGA-AK-3429-01A</b> | 2017 | 0 | 54 | FEMALE | G2 | Stage II  | T2  | M0 | N0 |
| <b>TCGA-AK-3431-01A</b> | 1853 | 0 | 62 | FEMALE | G3 | Stage II  | T2  | M0 | NX |
| <b>TCGA-AK-3434-01A</b> | 2087 | 0 | 72 | MALE   | G2 | Stage I   | T1b | M0 | NX |
| <b>TCGA-AK-3436-01A</b> | 2044 | 0 | 40 | MALE   | G2 | Stage IV  | T2  | M1 | N0 |
| <b>TCGA-AK-3445-01A</b> | 1280 | 0 | 69 | MALE   | G3 | Stage III | T3a | M0 | NX |
| <b>TCGA-AK-3451-01A</b> | 1481 | 0 | 48 | MALE   | G3 | Stage II  | T2  | M0 | N0 |
| <b>TCGA-AK-3453-01A</b> | 1397 | 0 | 58 | FEMALE | G2 | Stage II  | T2  | M0 | NX |

|                         |      |   |    |        |    |           |     |    |    |
|-------------------------|------|---|----|--------|----|-----------|-----|----|----|
| <b>TCGA-AK-3454-01A</b> | 874  | 0 | 84 | MALE   | G3 | Stage I   | T1b | M0 | NX |
| <b>TCGA-AK-3455-01A</b> | 683  | 1 | 71 | FEMALE | G3 | Stage III | T3b | M0 | NX |
| <b>TCGA-AK-3456-01A</b> | 1143 | 0 | 48 | MALE   | G3 | Stage II  | T2  | M0 | N0 |
| <b>TCGA-AK-3458-01A</b> | 1168 | 0 | 48 | MALE   | G3 | Stage I   | T1b | M0 | NX |
| <b>TCGA-AK-3460-01A</b> | 951  | 0 | 58 | MALE   | G2 | Stage I   | T1a | M0 | NX |
| <b>TCGA-AS-3778-01A</b> | 43   | 0 | 35 | MALE   | G1 | Stage I   | T1a | M0 | NX |
| <b>TCGA-B0-4690-01A</b> | 43   | 1 | 65 | MALE   | G3 | Stage IV  | T4  | M1 | N0 |
| <b>TCGA-B0-4691-01A</b> | 139  | 1 | 55 | MALE   | G3 | Stage IV  | T2  | M1 | N0 |
| <b>TCGA-B0-4693-01A</b> | 77   | 1 | 72 | FEMALE | G4 | Stage III | T3a | M0 | N0 |
| <b>TCGA-B0-4694-01A</b> | 106  | 1 | 72 | MALE   | G4 | Stage III | T3b | M0 | NX |
| <b>TCGA-B0-4697-01A</b> | 578  | 1 | 46 | FEMALE | G4 | Stage IV  | T3b | M1 | NX |
| <b>TCGA-B0-4698-01A</b> | 42   | 1 | 75 | MALE   | G4 | Stage IV  | T4  | M0 | NX |
| <b>TCGA-B0-4699-01A</b> | 110  | 1 | 74 | MALE   | G4 | Stage IV  | T4  | M1 | N0 |

|                         |      |   |    |        |    |           |     |    |    |
|-------------------------|------|---|----|--------|----|-----------|-----|----|----|
| <b>TCGA-B0-4700-01A</b> | 1980 | 1 | 60 | MALE   | G4 | Stage IV  | T4  | M1 | NX |
| <b>TCGA-B0-4701-01A</b> | 238  | 1 | 66 | FEMALE | G3 | Stage IV  | T3a | M1 | N0 |
| <b>TCGA-B0-4703-01A</b> | 182  | 1 | 51 | MALE   | G4 | Stage IV  | T3a | M1 | N0 |
| <b>TCGA-B0-4706-01A</b> | 65   | 1 | 61 | MALE   | G4 | Stage III | T3a | M0 | NX |
| <b>TCGA-B0-4707-01A</b> | 600  | 1 | 63 | MALE   | G4 | Stage III | T3a | M0 | NX |
| <b>TCGA-B0-4710-01A</b> | 96   | 0 | 75 | FEMALE | G3 | Stage III | T3a | M0 | N0 |
| <b>TCGA-B0-4712-01A</b> | 1337 | 1 | 76 | MALE   | G3 | Stage IV  | T3a | M1 | NX |
| <b>TCGA-B0-4713-01A</b> | 202  | 1 | 76 | FEMALE | G2 | Stage III | T3b | M0 | NX |
| <b>TCGA-B0-4714-01A</b> | 99   | 1 | 81 | MALE   | G3 | Stage IV  | T3b | M1 | NX |
| <b>TCGA-B0-4718-01A</b> | 616  | 0 | 57 | MALE   | G2 | Stage III | T3a | M0 | NX |
| <b>TCGA-B0-4810-01A</b> | 478  | 1 | 47 | MALE   | G3 | Stage III | T3a | M0 | N1 |
| <b>TCGA-B0-4811-01A</b> | 1417 | 1 | 48 | MALE   | G3 | Stage III | T3a | M0 | N0 |
| <b>TCGA-B0-4813-01A</b> | 18   | 1 | 68 | MALE   | G3 | Stage III | T3b | M0 | NX |

|                         |      |   |    |        |    |           |     |    |    |
|-------------------------|------|---|----|--------|----|-----------|-----|----|----|
| <b>TCGA-B0-4815-01A</b> | 1588 | 1 | 65 | MALE   | G4 | Stage III | T3a | M0 | NX |
| <b>TCGA-B0-4816-01A</b> | 1371 | 1 | 49 | MALE   | G3 | Stage II  | T2  | M0 | N0 |
| <b>TCGA-B0-4817-01A</b> | 1019 | 1 | 81 | MALE   | G3 | Stage III | T3c | M0 | N0 |
| <b>TCGA-B0-4818-01A</b> | 510  | 1 | 68 | FEMALE | G3 | Stage II  | T2  | M0 | NX |
| <b>TCGA-B0-4819-01A</b> | 183  | 1 | 60 | FEMALE | G4 | Stage IV  | T3b | M1 | NX |
| <b>TCGA-B0-4821-01A</b> | 1230 | 1 | 68 | FEMALE | G3 | Stage III | T3b | M0 | N0 |
| <b>TCGA-B0-4822-01A</b> | 1111 | 1 | 78 | MALE   | G4 | Stage II  | T2  | M0 | NX |
| <b>TCGA-B0-4823-01A</b> | 454  | 1 | 88 | MALE   | G2 | Stage I   | T1a | M0 | N0 |
| <b>TCGA-B0-4824-01A</b> | 1657 | 1 | 49 | FEMALE | G3 | Stage I   | T1a | M0 | N0 |
| <b>TCGA-B0-4827-01A</b> | 885  | 1 | 77 | FEMALE | G4 | Stage III | T3b | M0 | N0 |
| <b>TCGA-B0-4828-01A</b> | 307  | 1 | 79 | MALE   | G3 | Stage IV  | T2  | M1 | NX |
| <b>TCGA-B0-4833-01A</b> | 2386 | 1 | 82 | FEMALE | G2 | Stage I   | T1b | M0 | N0 |
| <b>TCGA-B0-4836-01A</b> | 1238 | 1 | 61 | MALE   | G3 | Stage IV  | T3b | M1 | NX |

|                         |      |   |    |        |    |           |     |    |    |
|-------------------------|------|---|----|--------|----|-----------|-----|----|----|
| <b>TCGA-B0-4837-01A</b> | 1378 | 1 | 63 | MALE   | G3 | Stage I   | T1b | M0 | N0 |
| <b>TCGA-B0-4838-01A</b> | 834  | 1 | 69 | FEMALE | G3 | Stage I   | T1b | M0 | N0 |
| <b>TCGA-B0-4839-01A</b> | 1639 | 1 | 80 | FEMALE | G2 | Stage I   | T1b | M0 | N0 |
| <b>TCGA-B0-4841-01A</b> | 204  | 1 | 63 | MALE   | G3 | Stage IV  | T2  | M1 | NX |
| <b>TCGA-B0-4842-01A</b> | 1724 | 1 | 73 | FEMALE | G4 | Stage III | T3a | M0 | N0 |
| <b>TCGA-B0-4843-01A</b> | 320  | 1 | 57 | MALE   | G3 | Stage III | T3a | M0 | N0 |
| <b>TCGA-B0-4844-01A</b> | 313  | 1 | 60 | MALE   | G3 | Stage IV  | T3a | M1 | NX |
| <b>TCGA-B0-4846-01A</b> | 1200 | 1 | 52 | MALE   | G2 | Stage IV  | T3a | M1 | N0 |
| <b>TCGA-B0-4847-01A</b> | 793  | 1 | 60 | MALE   | G3 | Stage IV  | T3a | M1 | NX |
| <b>TCGA-B0-4848-01A</b> | 883  | 1 | 54 | MALE   | G3 | Stage III | T3b | M0 | NX |
| <b>TCGA-B0-4849-01A</b> | 69   | 1 | 51 | MALE   | G3 | Stage III | T3a | M0 | NX |
| <b>TCGA-B0-4852-01A</b> | 1121 | 1 | 78 | FEMALE | G2 | Stage II  | T2  | M0 | N0 |
| <b>TCGA-B0-4945-01A</b> | 2145 | 1 | 75 | FEMALE | G2 | Stage I   | T1a | M0 | N0 |

|                         |      |   |    |        |    |           |     |    |    |
|-------------------------|------|---|----|--------|----|-----------|-----|----|----|
| <b>TCGA-B0-5075-01A</b> | 637  | 1 | 77 | FEMALE | G2 | Stage III | T3a | M0 | N0 |
| <b>TCGA-B0-5077-01A</b> | 1317 | 1 | 77 | MALE   | G3 | Stage I   | T1a | M0 | N0 |
| <b>TCGA-B0-5080-01A</b> | 342  | 1 | 63 | MALE   | G3 | Stage IV  | T3a | M1 | N0 |
| <b>TCGA-B0-5081-01A</b> | 362  | 1 | 79 | FEMALE | G2 | Stage III | T3b | M0 | N0 |
| <b>TCGA-B0-5083-01A</b> | 1045 | 1 | 63 | MALE   | G3 | Stage I   | T1a | M0 | N0 |
| <b>TCGA-B0-5084-01A</b> | 222  | 1 | 33 | MALE   | G3 | Stage IV  | T3a | M1 | N1 |
| <b>TCGA-B0-5088-01A</b> | 563  | 1 | 53 | MALE   | G3 | Stage I   | T1b | M0 | N0 |
| <b>TCGA-B0-5092-01A</b> | 459  | 1 | 53 | FEMALE | G3 | Stage IV  | T1a | M1 | N0 |
| <b>TCGA-B0-5095-01A</b> | 245  | 1 | 81 | MALE   | G3 | Stage III | T3a | M0 | N0 |
| <b>TCGA-B0-5096-01A</b> | 68   | 1 | 72 | FEMALE | GX | Stage III | T3a | M0 | N1 |
| <b>TCGA-B0-5097-01A</b> | 665  | 0 | 59 | FEMALE | G2 | Stage III | T3b | M0 | N0 |
| <b>TCGA-B0-5100-01A</b> | 1913 | 1 | 72 | MALE   | G3 | Stage III | T3a | M0 | NX |
| <b>TCGA-B0-5102-01A</b> | 2764 | 1 | 74 | FEMALE | G3 | Stage I   | T1  | M0 | NX |

|                         |      |   |    |        |    |           |     |    |    |
|-------------------------|------|---|----|--------|----|-----------|-----|----|----|
| <b>TCGA-B0-5106-01A</b> | 1598 | 1 | 64 | MALE   | G2 | Stage I   | T1a | M0 | N0 |
| <b>TCGA-B0-5107-01A</b> | 927  | 1 | 65 | FEMALE | G4 | Stage IV  | T2  | M1 | N0 |
| <b>TCGA-B0-5108-01A</b> | 911  | 0 | 54 | MALE   | G2 | Stage III | T3a | M0 | N0 |
| <b>TCGA-B0-5109-01A</b> | 587  | 1 | 69 | MALE   | G4 | Stage III | T3b | M0 | N1 |
| <b>TCGA-B0-5113-01A</b> | 359  | 0 | 69 | FEMALE | G2 | Stage III | T3a | M0 | N0 |
| <b>TCGA-B0-5115-01A</b> | 797  | 0 | 43 | MALE   | G3 | Stage IV  | T2  | M1 | N0 |
| <b>TCGA-B0-5120-01A</b> | 493  | 0 | 72 | FEMALE | G2 | Stage I   | T1a | M0 | N0 |
| <b>TCGA-B0-5121-01A</b> | 554  | 0 | 56 | MALE   | G2 | Stage I   | T1b | M0 | N0 |
| <b>TCGA-B0-5399-01A</b> | 652  | 0 | 46 | MALE   | G2 | Stage I   | T1b | M0 | N0 |
| <b>TCGA-B0-5400-01A</b> | 1132 | 0 | 59 | FEMALE | G4 | Stage III | T3b | M0 | N0 |
| <b>TCGA-B0-5402-01A</b> | 449  | 0 | 64 | MALE   | G4 | Stage IV  | T4  | M0 | NX |
| <b>TCGA-B0-5690-01A</b> | 2408 | 0 | 53 | FEMALE | G1 | Stage I   | T1b | M0 | NX |
| <b>TCGA-B0-5691-01A</b> | 3431 | 0 | 66 | FEMALE | G3 | Stage I   | T1a | M0 | N0 |

|                         |      |   |    |        |    |           |     |    |    |
|-------------------------|------|---|----|--------|----|-----------|-----|----|----|
| <b>TCGA-B0-5692-01A</b> | 1487 | 0 | 66 | FEMALE | G3 | Stage III | T3b | M0 | N0 |
| <b>TCGA-B0-5694-01A</b> | 480  | 1 | 71 | MALE   | G3 | Stage III | T3a | M0 | N0 |
| <b>TCGA-B0-5696-01A</b> | 1727 | 0 | 69 | MALE   | G4 | Stage III | T3a | M0 | N0 |
| <b>TCGA-B0-5697-01A</b> | 1835 | 0 | 50 | MALE   | G2 | Stage I   | T1a | M0 | N0 |
| <b>TCGA-B0-5698-01A</b> | 2583 | 0 | 77 | MALE   | G3 | Stage I   | T1b | M0 | N0 |
| <b>TCGA-B0-5699-01A</b> | 2741 | 0 | 53 | MALE   | G2 | Stage I   | T1  | M0 | N0 |
| <b>TCGA-B0-5701-01A</b> | 1732 | 0 | 65 | MALE   | G4 | Stage III | T3b | M0 | N0 |
| <b>TCGA-B0-5702-01A</b> | 1605 | 0 | 71 | MALE   | G2 | Stage I   | T1b | M0 | N0 |
| <b>TCGA-B0-5703-01A</b> | 1203 | 0 | 73 | MALE   | G3 | Stage I   | T1b | M0 | N0 |
| <b>TCGA-B0-5706-01A</b> | 2414 | 0 | 45 | MALE   | G2 | Stage II  | T2  | M0 | N0 |
| <b>TCGA-B0-5707-01A</b> | 2828 | 0 | 39 | FEMALE | G3 | Stage I   | T1a | M0 | N0 |
| <b>TCGA-B0-5709-01A</b> | 3117 | 0 | 62 | FEMALE | G3 | Stage III | T3a | M0 | NX |
| <b>TCGA-B0-5710-01A</b> | 1459 | 0 | 57 | MALE   | G2 | Stage I   | T1b | M0 | N0 |

|                         |      |   |    |        |        |           |     |    |    |
|-------------------------|------|---|----|--------|--------|-----------|-----|----|----|
| <b>TCGA-B0-5711-01A</b> | 2931 | 0 | 50 | MALE   | G3     | Stage III | T3b | M0 | NX |
| <b>TCGA-B0-5713-01A</b> | 1865 | 0 | 75 | FEMALE | G3     | Stage III | T3b | M0 | N0 |
| <b>TCGA-B2-3924-01A</b> | 371  | 0 | 73 | MALE   | G2     | Stage I   | T1b | M0 | NX |
| <b>TCGA-B2-4098-01A</b> | 51   | 1 | 72 | FEMALE | G2     | Stage I   | T1b | M0 | NX |
| <b>TCGA-B2-4099-01A</b> | 374  | 0 | 83 | MALE   | G3     | Stage I   | T1a | M0 | NX |
| <b>TCGA-B2-4101-01A</b> | 188  | 0 | 52 | MALE   | G3     | Stage II  | T2a | M0 | NX |
| <b>TCGA-B2-4102-01A</b> | 202  | 0 | 61 | MALE   | G2     | Stage I   | T1b | M0 | NX |
| <b>TCGA-B2-5633-01A</b> | 358  | 0 | 56 | MALE   | G2     | Stage I   | T1b | M0 | N0 |
| <b>TCGA-B2-5635-01A</b> | 315  | 0 | 74 | MALE   | G2     | Stage I   | T1a | M0 | NX |
| <b>TCGA-B2-5639-01A</b> | 417  | 0 | 46 | MALE   | G3     | Stage IV  | T3  | M1 | NX |
| <b>TCGA-B2-5641-01A</b> | 324  | 0 | 79 | MALE   | G3     | Stage I   | T1a | M0 | N0 |
| <b>TCGA-B2-A4SR-01A</b> | 507  | 0 | 61 | MALE   | unknow | Stage II  | T2a | M0 | NX |
| <b>TCGA-B4-5834-01A</b> | 38   | 0 | 59 | MALE   | G1     | Stage I   | T1  | M0 | N0 |

|                         |     |   |    |        |    |           |     |    |    |
|-------------------------|-----|---|----|--------|----|-----------|-----|----|----|
| <b>TCGA-B4-5838-01A</b> | 166 | 0 | 52 | MALE   | G2 | unknow    | T3  | M0 | N1 |
| <b>TCGA-B4-5844-01A</b> | 7   | 0 | 61 | FEMALE | G1 | Stage II  | T2  | M0 | N0 |
| <b>TCGA-B8-4143-01A</b> | 709 | 1 | 66 | FEMALE | G3 | Stage IV  | T3a | M1 | N0 |
| <b>TCGA-B8-4146-01B</b> | 511 | 0 | 41 | FEMALE | G2 | Stage I   | T1b | M0 | NX |
| <b>TCGA-B8-4148-01A</b> | 379 | 0 | 63 | FEMALE | G3 | Stage I   | T1a | M0 | N0 |
| <b>TCGA-B8-4154-01A</b> | 255 | 0 | 73 | FEMALE | G2 | Stage I   | T1a | M0 | N0 |
| <b>TCGA-B8-4620-01A</b> | 226 | 0 | 70 | FEMALE | G2 | Stage III | T3a | M0 | N0 |
| <b>TCGA-B8-4621-01A</b> | 431 | 0 | 63 | MALE   | G3 | Stage I   | T1b | M0 | N0 |
| <b>TCGA-B8-4622-01A</b> | 181 | 0 | 57 | MALE   | G3 | Stage IV  | T3a | M1 | N0 |
| <b>TCGA-B8-5158-01A</b> | 293 | 0 | 56 | MALE   | G4 | Stage III | T3a | M0 | N1 |
| <b>TCGA-B8-5159-01A</b> | 240 | 0 | 61 | FEMALE | G3 | Stage I   | T1a | M0 | N0 |
| <b>TCGA-B8-5162-01A</b> | 22  | 0 | 62 | MALE   | G2 | Stage II  | T2a | M0 | NX |
| <b>TCGA-B8-5163-01A</b> | 4   | 0 | 63 | FEMALE | G3 | Stage III | T3a | M0 | N0 |

|                         |     |   |    |        |    |           |     |    |    |
|-------------------------|-----|---|----|--------|----|-----------|-----|----|----|
| <b>TCGA-B8-5164-01A</b> | 23  | 0 | 65 | MALE   | G3 | Stage III | T3a | M0 | N0 |
| <b>TCGA-B8-5165-01A</b> | 8   | 0 | 43 | MALE   | G2 | Stage I   | T1a | M0 | N0 |
| <b>TCGA-B8-5545-01A</b> | 522 | 0 | 42 | MALE   | G2 | Stage I   | T1a | M0 | N0 |
| <b>TCGA-B8-5549-01A</b> | 194 | 0 | 53 | MALE   | G3 | Stage I   | T1b | M0 | N0 |
| <b>TCGA-B8-5550-01A</b> | 434 | 0 | 71 | MALE   | G3 | Stage III | T3a | M0 | N0 |
| <b>TCGA-B8-5551-01A</b> | 15  | 0 | 65 | FEMALE | G3 | Stage I   | T1b | M0 | N0 |
| <b>TCGA-B8-5552-01B</b> | 392 | 0 | 41 | FEMALE | G2 | Stage I   | T1b | M0 | NX |
| <b>TCGA-B8-5553-01A</b> | 435 | 0 | 67 | FEMALE | G2 | Stage I   | T1b | M0 | N0 |
| <b>TCGA-B8-A54D-01A</b> | 830 | 0 | 69 | MALE   | G2 | Stage III | T3a | MX | NX |
| <b>TCGA-B8-A54F-01A</b> | 519 | 0 | 49 | FEMALE | G2 | Stage I   | T1a | MX | NX |
| <b>TCGA-B8-A54G-01A</b> | 53  | 0 | 50 | MALE   | G3 | Stage I   | T1a | MX | NX |
| <b>TCGA-B8-A54H-01A</b> | 256 | 0 | 69 | FEMALE | G3 | Stage II  | T2a | MX | N0 |
| <b>TCGA-B8-A54I-01A</b> | 150 | 0 | 48 | MALE   | G3 | Stage I   | T1b | MX | NX |

|                         |      |   |    |        |    |           |     |        |    |
|-------------------------|------|---|----|--------|----|-----------|-----|--------|----|
| <b>TCGA-B8-A8YJ-01A</b> | 431  | 0 | 60 | FEMALE | G2 | Stage I   | T1b | unknow | NX |
| <b>TCGA-BP-4159-01A</b> | 2601 | 1 | 70 | MALE   | G2 | Stage I   | T1b | M0     | N0 |
| <b>TCGA-BP-4160-01A</b> | 2881 | 0 | 67 | MALE   | G2 | Stage III | T3a | M0     | N0 |
| <b>TCGA-BP-4161-01A</b> | 2746 | 0 | 74 | MALE   | G3 | Stage I   | T1b | M0     | NX |
| <b>TCGA-BP-4162-01A</b> | 3074 | 0 | 65 | FEMALE | G2 | Stage I   | T1b | M0     | N0 |
| <b>TCGA-BP-4163-01A</b> | 2839 | 0 | 60 | FEMALE | G3 | Stage III | T3a | M0     | N0 |
| <b>TCGA-BP-4165-01A</b> | 3037 | 0 | 64 | FEMALE | G1 | Stage I   | T1b | M0     | N0 |
| <b>TCGA-BP-4166-01A</b> | 13   | 0 | 69 | MALE   | G3 | Stage III | T3a | M0     | N0 |
| <b>TCGA-BP-4167-01A</b> | 2718 | 0 | 59 | MALE   | G2 | Stage III | T3a | M0     | NX |
| <b>TCGA-BP-4169-01A</b> | 701  | 1 | 76 | FEMALE | G2 | Stage II  | T2  | M0     | N0 |
| <b>TCGA-BP-4170-01A</b> | 2343 | 1 | 72 | FEMALE | G2 | Stage I   | T1b | M0     | N0 |
| <b>TCGA-BP-4173-01A</b> | 1893 | 0 | 47 | MALE   | G3 | Stage II  | T2  | M0     | N0 |
| <b>TCGA-BP-4174-01A</b> | 1879 | 0 | 49 | MALE   | G3 | Stage II  | T2  | M0     | N0 |

|                         |      |   |    |        |    |           |     |    |    |
|-------------------------|------|---|----|--------|----|-----------|-----|----|----|
| <b>TCGA-BP-4176-01A</b> | 1955 | 0 | 64 | MALE   | G2 | Stage I   | T1b | M0 | NX |
| <b>TCGA-BP-4325-01A</b> | 2964 | 0 | 64 | FEMALE | G2 | Stage I   | T1b | M0 | N0 |
| <b>TCGA-BP-4326-01A</b> | 1625 | 1 | 53 | FEMALE | G2 | Stage I   | T1b | M0 | N0 |
| <b>TCGA-BP-4327-01A</b> | 109  | 1 | 75 | FEMALE | G2 | Stage II  | T2  | M0 | N0 |
| <b>TCGA-BP-4329-01A</b> | 845  | 1 | 75 | MALE   | G2 | Stage III | T3a | M0 | N0 |
| <b>TCGA-BP-4330-01A</b> | 1888 | 0 | 60 | FEMALE | G2 | Stage III | T3a | M0 | N0 |
| <b>TCGA-BP-4331-01A</b> | 2454 | 1 | 52 | MALE   | G2 | Stage I   | T1a | M0 | N0 |
| <b>TCGA-BP-4332-01A</b> | 1133 | 0 | 36 | MALE   | G2 | Stage III | T3a | M0 | N0 |
| <b>TCGA-BP-4335-01A</b> | 475  | 1 | 65 | FEMALE | G3 | Stage IV  | T3a | M1 | N0 |
| <b>TCGA-BP-4337-01A</b> | 2    | 1 | 76 | FEMALE | G4 | Stage III | T3b | M0 | N0 |
| <b>TCGA-BP-4338-01A</b> | 2859 | 0 | 43 | MALE   | G3 | Stage I   | T1b | M0 | N0 |
| <b>TCGA-BP-4342-01A</b> | 2256 | 1 | 79 | MALE   | G3 | Stage II  | T2  | M0 | N0 |
| <b>TCGA-BP-4343-01A</b> | 1912 | 1 | 64 | MALE   | G3 | Stage III | T3a | M0 | N0 |

|                         |      |   |    |        |    |           |     |    |    |
|-------------------------|------|---|----|--------|----|-----------|-----|----|----|
| <b>TCGA-BP-4345-01A</b> | 1516 | 0 | 62 | MALE   | G3 | Stage III | T3b | M0 | N0 |
| <b>TCGA-BP-4346-01A</b> | 1493 | 1 | 57 | MALE   | G3 | Stage III | T3b | M0 | N0 |
| <b>TCGA-BP-4351-01A</b> | 970  | 0 | 51 | FEMALE | G2 | Stage III | T3a | M0 | N0 |
| <b>TCGA-BP-4353-01A</b> | 375  | 1 | 61 | MALE   | G2 | Stage I   | T1  | M0 | N0 |
| <b>TCGA-BP-4354-01A</b> | 1034 | 1 | 40 | MALE   | G4 | Stage IV  | T4  | M1 | N1 |
| <b>TCGA-BP-4756-01A</b> | 374  | 0 | 62 | FEMALE | G2 | Stage I   | T1b | M0 | N0 |
| <b>TCGA-BP-4758-01A</b> | 2208 | 0 | 40 | MALE   | G2 | Stage I   | T1a | M0 | NX |
| <b>TCGA-BP-4759-01A</b> | 2372 | 0 | 50 | MALE   | G2 | Stage I   | T1a | M0 | NX |
| <b>TCGA-BP-4760-01A</b> | 2361 | 0 | 69 | MALE   | G2 | Stage I   | T1a | M0 | NX |
| <b>TCGA-BP-4761-01A</b> | 182  | 0 | 57 | MALE   | G4 | Stage III | T3a | M0 | N1 |
| <b>TCGA-BP-4762-01A</b> | 1343 | 1 | 42 | MALE   | G3 | Stage I   | T1a | M0 | NX |
| <b>TCGA-BP-4763-01A</b> | 1270 | 1 | 79 | FEMALE | G2 | Stage I   | T1a | M0 | NX |
| <b>TCGA-BP-4766-01A</b> | 1462 | 0 | 43 | FEMALE | G3 | Stage I   | T1a | M0 | NX |

|                         |      |   |    |        |    |           |     |    |    |
|-------------------------|------|---|----|--------|----|-----------|-----|----|----|
| <b>TCGA-BP-4770-01A</b> | 329  | 1 | 73 | FEMALE | G4 | Stage IV  | T4  | M0 | N0 |
| <b>TCGA-BP-4771-01A</b> | 162  | 1 | 62 | MALE   | G4 | Stage IV  | T3a | M1 | N0 |
| <b>TCGA-BP-4776-01A</b> | 411  | 0 | 52 | MALE   | G2 | Stage I   | T1a | M0 | NX |
| <b>TCGA-BP-4777-01A</b> | 1731 | 0 | 46 | MALE   | G3 | Stage I   | T1a | M0 | NX |
| <b>TCGA-BP-4781-01A</b> | 2080 | 0 | 78 | MALE   | G3 | Stage I   | T1a | M0 | NX |
| <b>TCGA-BP-4782-01A</b> | 354  | 0 | 55 | FEMALE | G2 | Stage I   | T1a | M0 | NX |
| <b>TCGA-BP-4787-01A</b> | 480  | 1 | 59 | FEMALE | G4 | Stage IV  | T3a | M1 | N0 |
| <b>TCGA-BP-4790-01A</b> | 1111 | 1 | 76 | MALE   | G2 | Stage I   | T1a | M0 | NX |
| <b>TCGA-BP-4795-01A</b> | 620  | 0 | 74 | FEMALE | G2 | Stage I   | T1a | M0 | N0 |
| <b>TCGA-BP-4797-01A</b> | 1107 | 0 | 34 | MALE   | G3 | Stage III | T3b | M0 | N0 |
| <b>TCGA-BP-4798-01A</b> | 334  | 1 | 74 | MALE   | G4 | unknow    | T3b | M1 | N0 |
| <b>TCGA-BP-4799-01A</b> | 1133 | 1 | 70 | MALE   | G3 | Stage III | T3b | M0 | N0 |
| <b>TCGA-BP-4801-01A</b> | 1124 | 0 | 57 | MALE   | G2 | Stage I   | T1a | M0 | NX |

|                         |      |   |    |        |    |           |     |    |    |
|-------------------------|------|---|----|--------|----|-----------|-----|----|----|
| <b>TCGA-BP-4803-01A</b> | 204  | 0 | 79 | MALE   | G3 | Stage III | T3a | M0 | NX |
| <b>TCGA-BP-4804-01A</b> | 1459 | 0 | 59 | MALE   | G2 | Stage I   | T1b | M0 | NX |
| <b>TCGA-BP-4807-01A</b> | 211  | 0 | 42 | MALE   | G3 | Stage I   | T1a | M0 | NX |
| <b>TCGA-BP-4959-01A</b> | 2660 | 0 | 49 | MALE   | G3 | Stage I   | T1b | M0 | NX |
| <b>TCGA-BP-4960-01A</b> | 2172 | 0 | 46 | MALE   | G3 | Stage II  | T2  | M0 | N0 |
| <b>TCGA-BP-4961-01A</b> | 1935 | 0 | 47 | MALE   | G2 | Stage I   | T1a | M0 | NX |
| <b>TCGA-BP-4962-01A</b> | 1785 | 0 | 58 | MALE   | G2 | Stage II  | T2  | M0 | NX |
| <b>TCGA-BP-4963-01A</b> | 1834 | 0 | 63 | MALE   | G3 | Stage I   | T1b | M0 | NX |
| <b>TCGA-BP-4964-01A</b> | 1862 | 0 | 54 | FEMALE | G2 | Stage I   | T1a | M0 | N0 |
| <b>TCGA-BP-4965-01A</b> | 1871 | 0 | 46 | MALE   | G2 | Stage I   | T1a | M0 | NX |
| <b>TCGA-BP-4968-01A</b> | 1746 | 0 | 40 | MALE   | G3 | Stage I   | T1b | M0 | N0 |
| <b>TCGA-BP-4970-01A</b> | 433  | 0 | 44 | MALE   | G3 | Stage III | T1a | M0 | N1 |
| <b>TCGA-BP-4971-01A</b> | 1487 | 0 | 40 | MALE   | G3 | Stage III | T3a | M0 | N0 |

|                         |      |   |    |        |    |           |     |    |    |
|-------------------------|------|---|----|--------|----|-----------|-----|----|----|
| <b>TCGA-BP-4972-01A</b> | 1502 | 0 | 43 | FEMALE | G3 | Stage III | T3a | M0 | NX |
| <b>TCGA-BP-4973-01A</b> | 1384 | 0 | 47 | MALE   | G3 | Stage III | T3a | M0 | NX |
| <b>TCGA-BP-4975-01A</b> | 1433 | 0 | 40 | MALE   | G3 | Stage I   | T1b | M0 | NX |
| <b>TCGA-BP-4977-01A</b> | 454  | 0 | 57 | MALE   | G3 | Stage I   | T1b | M0 | NX |
| <b>TCGA-BP-4981-01A</b> | 1097 | 1 | 75 | FEMALE | G3 | Stage III | T3a | M0 | NX |
| <b>TCGA-BP-4982-01A</b> | 1014 | 0 | 42 | MALE   | G3 | Stage I   | T1b | M0 | NX |
| <b>TCGA-BP-4983-01A</b> | 1413 | 0 | 67 | FEMALE | G4 | Stage III | T3a | M0 | NX |
| <b>TCGA-BP-4985-01A</b> | 952  | 1 | 72 | MALE   | G4 | Stage III | T3a | M0 | N0 |
| <b>TCGA-BP-4986-01A</b> | 785  | 0 | 75 | MALE   | G3 | Stage I   | T1a | M0 | N0 |
| <b>TCGA-BP-4987-01A</b> | 1124 | 0 | 41 | FEMALE | G2 | Stage I   | T1b | M0 | NX |
| <b>TCGA-BP-4989-01A</b> | 118  | 0 | 58 | MALE   | G3 | Stage III | T3a | M0 | N0 |
| <b>TCGA-BP-4991-01A</b> | 1413 | 0 | 54 | MALE   | G2 | Stage I   | T1a | M0 | NX |
| <b>TCGA-BP-4992-01A</b> | 501  | 0 | 66 | MALE   | G4 | Stage I   | T1b | M0 | NX |

|                         |      |   |    |      |    |           |     |    |    |
|-------------------------|------|---|----|------|----|-----------|-----|----|----|
| <b>TCGA-BP-4993-01A</b> | 177  | 0 | 58 | MALE | G3 | Stage I   | T1a | M0 | NX |
| <b>TCGA-BP-4995-01A</b> | 1371 | 0 | 68 | MALE | G3 | Stage I   | T1b | M0 | N0 |
| <b>TCGA-BP-4998-01A</b> | 932  | 0 | 49 | MALE | G3 | Stage I   | T1a | M0 | NX |
| <b>TCGA-BP-4999-01A</b> | 1266 | 0 | 56 | MALE | G2 | Stage I   | T1a | M0 | NX |
| <b>TCGA-BP-5000-01A</b> | 563  | 0 | 40 | MALE | G3 | Stage I   | T1b | M0 | NX |
| <b>TCGA-BP-5004-01A</b> | 1126 | 0 | 53 | MALE | G3 | Stage I   | T1a | M0 | NX |
| <b>TCGA-BP-5007-01A</b> | 1140 | 0 | 45 | MALE | G2 | Stage II  | T2  | M0 | N0 |
| <b>TCGA-BP-5008-01A</b> | 1071 | 0 | 46 | MALE | G2 | Stage I   | T1a | M0 | NX |
| <b>TCGA-BP-5009-01A</b> | 1092 | 1 | 52 | MALE | G3 | Stage I   | T1b | M0 | NX |
| <b>TCGA-BP-5010-01A</b> | 878  | 1 | 63 | MALE | G4 | Stage III | T3a | M0 | N0 |
| <b>TCGA-BP-5168-01A</b> | 1463 | 1 | 75 | MALE | G2 | Stage I   | T1a | M0 | NX |
| <b>TCGA-BP-5169-01A</b> | 193  | 0 | 70 | MALE | G4 | Stage I   | T1b | M0 | N0 |
| <b>TCGA-BP-5170-01A</b> | 2412 | 0 | 55 | MALE | G2 | Stage I   | T1a | M0 | NX |

|                         |      |   |    |        |    |           |     |    |    |
|-------------------------|------|---|----|--------|----|-----------|-----|----|----|
| <b>TCGA-BP-5173-01A</b> | 62   | 1 | 75 | MALE   | G2 | Stage I   | T1a | M0 | NX |
| <b>TCGA-BP-5175-01A</b> | 932  | 0 | 60 | MALE   | G3 | Stage I   | T1a | M0 | NX |
| <b>TCGA-BP-5176-01A</b> | 1590 | 1 | 78 | FEMALE | G2 | Stage I   | T1a | M0 | NX |
| <b>TCGA-BP-5177-01A</b> | 293  | 0 | 46 | FEMALE | G3 | Stage I   | T1a | M0 | NX |
| <b>TCGA-BP-5178-01A</b> | 1912 | 1 | 71 | MALE   | G4 | Stage IV  | T3a | M1 | NX |
| <b>TCGA-BP-5180-01A</b> | 2263 | 0 | 53 | MALE   | G2 | Stage I   | T1a | M0 | NX |
| <b>TCGA-BP-5181-01A</b> | 1495 | 0 | 58 | FEMALE | G2 | Stage I   | T1b | M0 | NX |
| <b>TCGA-BP-5182-01A</b> | 1165 | 0 | 56 | MALE   | G3 | Stage I   | T1a | M0 | N0 |
| <b>TCGA-BP-5183-01A</b> | 1291 | 0 | 57 | MALE   | G3 | Stage III | T3a | M0 | NX |
| <b>TCGA-BP-5184-01A</b> | 1133 | 0 | 54 | MALE   | G3 | Stage I   | T1a | M0 | NX |
| <b>TCGA-BP-5186-01A</b> | 693  | 0 | 50 | FEMALE | G2 | Stage I   | T1a | M0 | N0 |
| <b>TCGA-BP-5187-01A</b> | 406  | 0 | 54 | MALE   | G2 | Stage I   | T1a | M0 | NX |
| <b>TCGA-BP-5189-01A</b> | 822  | 1 | 60 | MALE   | G4 | Stage I   | T1b | M0 | NX |

|                         |      |   |    |        |    |           |     |    |    |
|-------------------------|------|---|----|--------|----|-----------|-----|----|----|
| <b>TCGA-BP-5190-01A</b> | 1011 | 0 | 61 | MALE   | G3 | Stage I   | T1a | M0 | NX |
| <b>TCGA-BP-5191-01A</b> | 967  | 0 | 79 | MALE   | G2 | Stage III | T3a | M0 | N0 |
| <b>TCGA-BP-5195-01A</b> | 749  | 0 | 75 | MALE   | G2 | Stage I   | T1a | M0 | NX |
| <b>TCGA-BP-5196-01A</b> | 1018 | 0 | 53 | MALE   | G2 | Stage I   | T1a | M0 | NX |
| <b>TCGA-BP-5198-01A</b> | 603  | 0 | 72 | MALE   | G3 | Stage III | T3b | M0 | N0 |
| <b>TCGA-BP-5199-01A</b> | 1355 | 0 | 58 | MALE   | G4 | Stage II  | T2  | M0 | N0 |
| <b>TCGA-BP-5200-01A</b> | 1063 | 0 | 44 | MALE   | G4 | Stage II  | T2  | M0 | NX |
| <b>TCGA-BP-5201-01A</b> | 951  | 0 | 63 | MALE   | G4 | Stage IV  | T3b | M1 | N0 |
| <b>TCGA-BP-5202-01A</b> | 29   | 0 | 75 | MALE   | G2 | Stage III | T3a | M0 | NX |
| <b>TCGA-CJ-4634-01A</b> | 1820 | 0 | 60 | FEMALE | G2 | Stage I   | T1b | M0 | NX |
| <b>TCGA-CJ-4635-01A</b> | 1416 | 0 | 48 | MALE   | G3 | Stage I   | T1b | M0 | NX |
| <b>TCGA-CJ-4636-01A</b> | 1924 | 0 | 51 | MALE   | G3 | Stage III | T3a | M0 | N0 |
| <b>TCGA-CJ-4637-01A</b> | 2227 | 1 | 52 | FEMALE | G4 | Stage IV  | T2b | M1 | NX |

|                         |      |   |    |        |    |           |     |    |    |
|-------------------------|------|---|----|--------|----|-----------|-----|----|----|
| <b>TCGA-CJ-4639-01A</b> | 2308 | 0 | 49 | FEMALE | G2 | Stage II  | T2  | M0 | N0 |
| <b>TCGA-CJ-4640-01A</b> | 1998 | 0 | 49 | MALE   | G4 | Stage III | T3a | M0 | N0 |
| <b>TCGA-CJ-4641-01A</b> | 1661 | 1 | 55 | FEMALE | G4 | Stage IV  | T3a | M1 | NX |
| <b>TCGA-CJ-4642-01B</b> | 1628 | 0 | 47 | MALE   | G2 | Stage II  | T2  | M0 | NX |
| <b>TCGA-CJ-4643-01A</b> | 1793 | 0 | 67 | FEMALE | G3 | Stage II  | T2b | M0 | N0 |
| <b>TCGA-CJ-4644-01A</b> | 336  | 1 | 48 | FEMALE | G3 | Stage IV  | T3a | M1 | N0 |
| <b>TCGA-CJ-4868-01A</b> | 646  | 1 | 42 | MALE   | G3 | Stage IV  | T3a | M1 | N0 |
| <b>TCGA-CJ-4869-01A</b> | 2554 | 0 | 49 | MALE   | G2 | Stage III | T2  | M0 | N1 |
| <b>TCGA-CJ-4870-01A</b> | 1498 | 0 | 58 | FEMALE | G2 | Stage III | T3a | M0 | NX |
| <b>TCGA-CJ-4871-01A</b> | 2423 | 0 | 63 | MALE   | G4 | Stage IV  | T3a | M1 | NX |
| <b>TCGA-CJ-4872-01A</b> | 1435 | 0 | 51 | MALE   | G4 | Stage I   | T1b | M0 | N0 |
| <b>TCGA-CJ-4873-01A</b> | 1776 | 0 | 85 | FEMALE | G3 | Stage III | T3a | M0 | N0 |
| <b>TCGA-CJ-4874-01A</b> | 2283 | 0 | 73 | FEMALE | G3 | Stage I   | T1b | M0 | N0 |

|                         |      |   |    |        |    |           |     |    |    |
|-------------------------|------|---|----|--------|----|-----------|-----|----|----|
| <b>TCGA-CJ-4875-01A</b> | 2353 | 0 | 67 | MALE   | G3 | Stage IV  | T3a | M1 | NX |
| <b>TCGA-CJ-4876-01A</b> | 1955 | 0 | 57 | MALE   | G3 | Stage II  | T2b | M0 | N0 |
| <b>TCGA-CJ-4881-01A</b> | 2014 | 0 | 41 | MALE   | G3 | Stage III | T3a | M0 | NX |
| <b>TCGA-CJ-4882-01A</b> | 1883 | 0 | 57 | MALE   | G3 | Stage III | T3a | M0 | NX |
| <b>TCGA-CJ-4884-01A</b> | 1759 | 0 | 72 | FEMALE | G3 | Stage III | T3a | M0 | NX |
| <b>TCGA-CJ-4886-01A</b> | 1952 | 0 | 42 | FEMALE | G3 | Stage I   | T1a | M0 | NX |
| <b>TCGA-CJ-4887-01A</b> | 932  | 1 | 48 | MALE   | G3 | Stage IV  | T3a | M1 | NX |
| <b>TCGA-CJ-4888-01A</b> | 1567 | 1 | 59 | MALE   | G4 | Stage IV  | T3a | M1 | NX |
| <b>TCGA-CJ-4889-01A</b> | 1946 | 0 | 63 | FEMALE | G4 | Stage I   | T1a | M0 | NX |
| <b>TCGA-CJ-4890-01A</b> | 2085 | 0 | 72 | MALE   | G4 | Stage IV  | T3a | M1 | N0 |
| <b>TCGA-CJ-4891-01A</b> | 819  | 1 | 57 | FEMALE | G4 | Stage III | T3c | M0 | N0 |
| <b>TCGA-CJ-4892-01A</b> | 1521 | 0 | 65 | FEMALE | G2 | Stage I   | T1b | M0 | N0 |
| <b>TCGA-CJ-4893-01A</b> | 750  | 0 | 76 | FEMALE | G3 | Stage I   | T1b | M0 | NX |

|                         |      |   |    |        |    |           |     |    |    |
|-------------------------|------|---|----|--------|----|-----------|-----|----|----|
| <b>TCGA-CJ-4894-01A</b> | 841  | 1 | 58 | MALE   | G3 | Stage III | T3a | M0 | N0 |
| <b>TCGA-CJ-4895-01A</b> | 1200 | 1 | 62 | MALE   | G4 | Stage IV  | T3a | M1 | NX |
| <b>TCGA-CJ-4897-01A</b> | 1808 | 0 | 79 | FEMALE | G3 | Stage III | T3a | M0 | NX |
| <b>TCGA-CJ-4899-01A</b> | 1528 | 0 | 42 | MALE   | G2 | Stage I   | T1b | M0 | NX |
| <b>TCGA-CJ-4900-01A</b> | 1714 | 1 | 69 | FEMALE | G4 | Stage IV  | T4  | M1 | N1 |
| <b>TCGA-CJ-4901-01A</b> | 1450 | 0 | 47 | MALE   | G3 | Stage III | T3b | M0 | NX |
| <b>TCGA-CJ-4902-01A</b> | 1520 | 0 | 61 | MALE   | G3 | Stage III | T3a | M0 | NX |
| <b>TCGA-CJ-4903-01A</b> | 1560 | 0 | 50 | MALE   | G3 | Stage I   | T1b | M0 | NX |
| <b>TCGA-CJ-4904-01A</b> | 1792 | 0 | 60 | FEMALE | G3 | Stage IV  | T3a | M1 | N0 |
| <b>TCGA-CJ-4905-01A</b> | 1496 | 0 | 62 | FEMALE | G2 | Stage I   | T1a | M0 | NX |
| <b>TCGA-CJ-4907-01A</b> | 1499 | 0 | 58 | MALE   | G3 | Stage III | T3b | M0 | NX |
| <b>TCGA-CJ-4908-01A</b> | 1531 | 0 | 38 | MALE   | G2 | Stage I   | T1a | M0 | NX |
| <b>TCGA-CJ-4912-01A</b> | 1657 | 0 | 61 | MALE   | G3 | Stage II  | T2  | M0 | NX |

|                         |      |   |    |        |    |           |     |    |    |
|-------------------------|------|---|----|--------|----|-----------|-----|----|----|
| <b>TCGA-CJ-4916-01A</b> | 1373 | 0 | 69 | FEMALE | G3 | Stage III | T3a | M0 | NX |
| <b>TCGA-CJ-4918-01A</b> | 93   | 1 | 64 | MALE   | G4 | Stage IV  | T3a | M1 | N0 |
| <b>TCGA-CJ-4920-01A</b> | 139  | 1 | 64 | FEMALE | G2 | Stage I   | T1b | M0 | NX |
| <b>TCGA-CJ-5671-01A</b> | 1943 | 0 | 51 | MALE   | G3 | Stage I   | T1a | M0 | NX |
| <b>TCGA-CJ-5672-01A</b> | 1972 | 1 | 84 | MALE   | G3 | Stage I   | T1a | M0 | NX |
| <b>TCGA-CJ-5675-01A</b> | 2430 | 0 | 70 | MALE   | G3 | Stage II  | T2a | M0 | NX |
| <b>TCGA-CJ-5676-01A</b> | 2575 | 0 | 47 | MALE   | G3 | Stage III | T3b | M0 | NX |
| <b>TCGA-CJ-5677-01A</b> | 782  | 1 | 54 | FEMALE | G4 | Stage IV  | T3a | M1 | NX |
| <b>TCGA-CJ-5678-01A</b> | 574  | 1 | 62 | MALE   | G3 | Stage IV  | T2b | M1 | N0 |
| <b>TCGA-CJ-5679-01A</b> | 679  | 1 | 73 | MALE   | G4 | Stage III | T3b | M0 | NX |
| <b>TCGA-CJ-5680-01A</b> | 768  | 1 | 65 | FEMALE | G4 | Stage IV  | T3a | M1 | NX |
| <b>TCGA-CJ-5681-01A</b> | 552  | 1 | 44 | FEMALE | G3 | Stage IV  | T3a | M1 | NX |
| <b>TCGA-CJ-5682-01A</b> | 1883 | 0 | 60 | MALE   | G4 | Stage IV  | T3a | M1 | NX |

|                         |      |   |    |        |    |           |     |    |    |
|-------------------------|------|---|----|--------|----|-----------|-----|----|----|
| <b>TCGA-CJ-5684-01A</b> | 2231 | 0 | 61 | MALE   | G2 | Stage III | T3a | M0 | NX |
| <b>TCGA-CJ-5686-01A</b> | 2038 | 0 | 59 | FEMALE | G3 | Stage I   | T1b | M0 | NX |
| <b>TCGA-CJ-5689-01A</b> | 0    | 1 | 90 | MALE   | G4 | Stage I   | T1b | M0 | NX |
| <b>TCGA-CJ-6027-01A</b> | 1855 | 0 | 77 | MALE   | G4 | Stage I   | T1a | M0 | NX |
| <b>TCGA-CJ-6028-01A</b> | 1625 | 1 | 58 | MALE   | G4 | Stage IV  | T3a | M1 | NX |
| <b>TCGA-CJ-6030-01A</b> | 2299 | 1 | 65 | MALE   | G3 | Stage I   | T1a | M0 | N0 |
| <b>TCGA-CJ-6031-01A</b> | 1906 | 0 | 54 | MALE   | G3 | Stage I   | T1b | M0 | NX |
| <b>TCGA-CJ-6033-01A</b> | 224  | 1 | 54 | FEMALE | G4 | Stage IV  | T3a | M1 | N0 |
| <b>TCGA-CW-5580-01A</b> | 1964 | 1 | 73 | FEMALE | G3 | Stage IV  | T3a | M1 | NX |
| <b>TCGA-CW-5581-01A</b> | 2799 | 0 | 44 | MALE   | G3 | Stage I   | T1b | M0 | NX |
| <b>TCGA-CW-5584-01A</b> | 164  | 1 | 74 | MALE   | G3 | Stage III | T3b | M0 | N1 |
| <b>TCGA-CW-5587-01A</b> | 2226 | 0 | 62 | FEMALE | G2 | Stage III | T3b | M0 | N0 |
| <b>TCGA-CW-5588-01A</b> | 2017 | 0 | 78 | FEMALE | G2 | Stage I   | T1a | M0 | NX |

|                         |      |   |    |        |    |           |     |    |    |
|-------------------------|------|---|----|--------|----|-----------|-----|----|----|
| <b>TCGA-CW-5589-01A</b> | 2378 | 0 | 52 | MALE   | G2 | Stage I   | T1a | M0 | NX |
| <b>TCGA-CW-5590-01A</b> | 1075 | 1 | 51 | MALE   | G3 | Stage IV  | T3a | M1 | NX |
| <b>TCGA-CW-6087-01A</b> | 41   | 1 | 61 | MALE   | G4 | Stage IV  | T3a | M1 | N1 |
| <b>TCGA-CW-6090-01A</b> | 2552 | 0 | 68 | MALE   | G3 | Stage I   | T1b | M0 | NX |
| <b>TCGA-CW-6097-01A</b> | 571  | 1 | 32 | MALE   | G4 | Stage III | T3a | M0 | NX |
| <b>TCGA-CZ-4853-01A</b> | 774  | 0 | 82 | MALE   | G2 | Stage I   | T1a | M0 | NX |
| <b>TCGA-CZ-4854-01A</b> | 1404 | 1 | 68 | MALE   | G2 | Stage I   | T1b | M0 | N0 |
| <b>TCGA-CZ-4856-01A</b> | 18   | 0 | 62 | FEMALE | G2 | Stage I   | T1b | M0 | N0 |
| <b>TCGA-CZ-4857-01A</b> | 1432 | 1 | 56 | MALE   | G3 | Stage IV  | T3a | M1 | N0 |
| <b>TCGA-CZ-4858-01A</b> | 1943 | 0 | 39 | MALE   | G4 | Stage II  | T2  | M0 | NX |
| <b>TCGA-CZ-4860-01A</b> | 206  | 1 | 60 | MALE   | G4 | Stage IV  | T4  | M1 | NX |
| <b>TCGA-CZ-4861-01A</b> | 446  | 1 | 63 | MALE   | G2 | Stage II  | T2  | M0 | NX |
| <b>TCGA-CZ-4862-01A</b> | 1843 | 0 | 46 | MALE   | G2 | Stage I   | T1b | M0 | NX |

|                         |      |   |    |        |    |           |     |    |    |
|-------------------------|------|---|----|--------|----|-----------|-----|----|----|
| <b>TCGA-CZ-4863-01A</b> | 1691 | 0 | 51 | FEMALE | G3 | Stage III | T3b | M0 | N0 |
| <b>TCGA-CZ-4864-01A</b> | 1315 | 1 | 86 | MALE   | G3 | Stage II  | T2  | M0 | N0 |
| <b>TCGA-CZ-4865-01A</b> | 166  | 1 | 70 | FEMALE | G2 | Stage I   | T1a | M0 | NX |
| <b>TCGA-CZ-4866-01A</b> | 1768 | 0 | 79 | FEMALE | G3 | Stage I   | T1  | M0 | NX |
| <b>TCGA-CZ-5452-01A</b> | 1556 | 0 | 69 | MALE   | G2 | Stage II  | T2  | M0 | N0 |
| <b>TCGA-CZ-5454-01A</b> | 722  | 1 | 63 | MALE   | G2 | Stage IV  | T2  | M1 | N0 |
| <b>TCGA-CZ-5455-01A</b> | 561  | 1 | 63 | MALE   | G4 | Stage IV  | T3b | M1 | NX |
| <b>TCGA-CZ-5456-01A</b> | 1558 | 0 | 57 | MALE   | G3 | Stage II  | T2  | M0 | N0 |
| <b>TCGA-CZ-5457-01A</b> | 1547 | 0 | 62 | MALE   | G4 | Stage III | T3a | M0 | NX |
| <b>TCGA-CZ-5458-01A</b> | 1558 | 0 | 43 | MALE   | G3 | Stage III | T3a | M0 | NX |
| <b>TCGA-CZ-5459-01A</b> | 1515 | 0 | 63 | MALE   | G3 | Stage III | T3b | M0 | NX |
| <b>TCGA-CZ-5461-01A</b> | 330  | 1 | 52 | MALE   | G4 | Stage IV  | T1b | M1 | NX |
| <b>TCGA-CZ-5462-01A</b> | 311  | 1 | 83 | MALE   | G3 | Stage IV  | T1b | M1 | NX |

|                         |      |   |    |        |    |           |     |    |    |
|-------------------------|------|---|----|--------|----|-----------|-----|----|----|
| <b>TCGA-CZ-5463-01A</b> | 662  | 0 | 76 | MALE   | G2 | Stage II  | T2  | M0 | NX |
| <b>TCGA-CZ-5464-01A</b> | 1492 | 0 | 69 | MALE   | G2 | Stage IV  | T3b | M1 | NX |
| <b>TCGA-CZ-5465-01A</b> | 1377 | 0 | 76 | FEMALE | G2 | Stage III | T3b | M0 | NX |
| <b>TCGA-CZ-5466-01A</b> | 685  | 0 | 67 | MALE   | G2 | Stage III | T3a | M0 | NX |
| <b>TCGA-CZ-5467-01A</b> | 73   | 1 | 86 | FEMALE | G4 | Stage III | T3a | M0 | N0 |
| <b>TCGA-CZ-5468-01A</b> | 59   | 1 | 84 | MALE   | G4 | Stage IV  | T3b | M1 | NX |
| <b>TCGA-CZ-5470-01A</b> | 0    | 0 | 72 | FEMALE | G3 | Stage II  | T2  | M0 | N0 |
| <b>TCGA-CZ-5984-01A</b> | 1491 | 0 | 51 | MALE   | G3 | Stage I   | T1b | M0 | N0 |
| <b>TCGA-CZ-5985-01A</b> | 1629 | 0 | 58 | MALE   | G2 | Stage II  | T2  | M0 | N0 |
| <b>TCGA-CZ-5987-01A</b> | 445  | 1 | 60 | MALE   | G2 | Stage IV  | T3b | M1 | NX |
| <b>TCGA-CZ-5988-01A</b> | 693  | 0 | 38 | MALE   | G2 | Stage I   | T1b | M0 | N0 |
| <b>TCGA-CZ-5989-01A</b> | 1599 | 0 | 60 | MALE   | G2 | Stage II  | T2  | M0 | N0 |
| <b>TCGA-DV-5565-01A</b> | 1329 | 0 | 59 | MALE   | G2 | Stage I   | T1a | M0 | NX |

|                         |      |   |    |        |        |          |     |    |    |
|-------------------------|------|---|----|--------|--------|----------|-----|----|----|
| <b>TCGA-DV-5566-01A</b> | 1398 | 0 | 67 | FEMALE | G2     | Stage I  | T1a | M0 | NX |
| <b>TCGA-DV-5568-01A</b> | 370  | 0 | 26 | MALE   | G2     | Stage I  | T1a | M0 | NX |
| <b>TCGA-DV-5569-01A</b> | 355  | 0 | 29 | FEMALE | G2     | Stage I  | T1a | M0 | NX |
| <b>TCGA-DV-5573-01A</b> | 1130 | 0 | 41 | MALE   | G2     | Stage I  | T1a | M0 | NX |
| <b>TCGA-DV-5574-01A</b> | 723  | 0 | 37 | MALE   | G2     | Stage I  | T1a | M0 | NX |
| <b>TCGA-DV-5575-01A</b> | 1006 | 0 | 52 | FEMALE | G2     | Stage I  | T1a | M0 | NX |
| <b>TCGA-DV-A4VX-01A</b> | 1626 | 1 | 59 | MALE   | G4     | Stage IV | T3b | MX | N0 |
| <b>TCGA-EU-5905-01A</b> | 119  | 0 | 67 | FEMALE | G3     | Stage I  | T1  | M0 | NX |
| <b>TCGA-EU-5906-01A</b> | 206  | 0 | 55 | MALE   | G2     | Stage I  | T1b | M0 | NX |
| <b>TCGA-G6-A5PC-01A</b> | 242  | 1 | 54 | FEMALE | G4     | Stage IV | T1b | M1 | N0 |
| <b>TCGA-G6-A8L6-01A</b> | 313  | 1 | 55 | MALE   | G3     | Stage IV | T2a | MX | NX |
| <b>TCGA-G6-A8L7-01A</b> | 2133 | 0 | 81 | FEMALE | G3     | Stage I  | T1b | MX | N0 |
| <b>TCGA-GK-A6C7-01A</b> | 61   | 0 | 76 | FEMALE | unknow | Stage I  | T1a | MX | NX |

|                         |        |        |        |        |    |           |     |    |    |
|-------------------------|--------|--------|--------|--------|----|-----------|-----|----|----|
| <b>TCGA-MM-A563-01A</b> | 591    | 0      | 41     | MALE   | G2 | unknow    | T3  | MX | NX |
| <b>TCGA-MM-A564-01A</b> | 607    | 0      | 68     | MALE   | G2 | Stage II  | T2a | MX | NX |
| <b>TCGA-MM-A84U-01A</b> | 700    | 0      | 58     | FEMALE | G2 | Stage I   | T1a | MX | NX |
| <b>TCGA-MW-A4EC-01A</b> | 498    | 0      | 72     | FEMALE | G2 | Stage I   | T1a | MX | NX |
| <b>GSM904989</b>        | unknow | unknow | 77     | FEMALE | G2 | unknow    | T2  | MX | N0 |
| <b>GSM904991</b>        | unknow | unknow | 45     | MALE   | G2 | stage II  | T2  | M0 | N0 |
| <b>GSM904994</b>        | unknow | unknow | 48     | FEMALE | G2 | stage II  | T2  | M0 | N0 |
| <b>GSM904996</b>        | unknow | unknow | 85     | FEMALE | G2 | stage I   | T1  | M0 | N0 |
| <b>GSM904999</b>        | unknow | unknow | 72     | FEMALE | G2 | unknow    | T1  | MX | NX |
| <b>GSM905002</b>        | unknow | unknow | 51     | MALE   | G2 | unknow    | T1  | MX | NX |
| <b>GSM905007</b>        | unknow | unknow | 79     | FEMALE | G2 | unknow    | T1  | MX | N0 |
| <b>GSM905009</b>        | unknow | unknow | unknow | FEMALE | G2 | unknow    | T1  | MX | N0 |
| <b>GSM905014</b>        | unknow | unknow | 60     | MALE   | G2 | unknow    | T1  | MX | NX |
| <b>GSM905017</b>        | unknow | unknow | 80     | FEMALE | G1 | unknow    | T1  | MX | NX |
| <b>GSM905022</b>        | unknow | unknow | 70     | MALE   | G2 | unknow    | T1  | MX | NX |
| <b>GSM905026</b>        | unknow | unknow | 59     | MALE   | G4 | unknow    | T3  | M0 | NX |
| <b>GSM905029</b>        | unknow | unknow | 35     | MALE   | G3 | unknow    | T3  | M0 | NX |
| <b>GSM905031</b>        | unknow | unknow | 56     | FEMALE | G3 | unknow    | T3  | M0 | NX |
| <b>GSM905034</b>        | unknow | unknow | 74     | MALE   | G4 | stage III | T2  | M0 | N1 |
| <b>GSM905036</b>        | unknow | unknow | 82     | FEMALE | G3 | stage IV  | T3  | M1 | NX |
| <b>GSM905038</b>        | unknow | unknow | 52     | MALE   | G4 | stage I   | T1  | M0 | N0 |
| <b>GSM905043</b>        | unknow | unknow | 56     | MALE   | G4 | stage III | T3  | M0 | N1 |

|                   |         |         |         |         |         |           |         |         |         |
|-------------------|---------|---------|---------|---------|---------|-----------|---------|---------|---------|
| <b>GSM905023</b>  | unknow  | unknow  | 67      | MALE    | G3      | stage III | T3      | M0      | N0      |
| <b>GSM905024</b>  | unknow  | unknow  | 73      | MALE    | G4      | stage IV  | T3      | M1      | NX      |
| <b>GSM905027</b>  | unknow  | unknow  | 52      | MALE    | G4      | stage IV  | T4      | M1      | N1      |
| <b>GSM905032</b>  | unknow  | unknow  | 74      | FEMALE  | G4      | stage IV  | T4      | M0      | NX      |
| <b>GSM905041</b>  | unknow  | unknow  | 30      | MALE    | G3      | unknow    | T3      | M0      | NX      |
| <b>GSM905044</b>  | unknow  | unknow  | 56      | MALE    | G2      | stage IV  | T1      | M1      | NX      |
| <b>GSM1300064</b> | unknown | unknown | unknown | unknown | unknown | stage I   | unknown | unknown | unknown |
| <b>GSM1300066</b> | unknown | unknown | unknown | unknown | unknown | stage I   | unknown | unknown | unknown |
| <b>GSM1300068</b> | unknown | unknown | unknown | unknown | unknown | stage I   | unknown | unknown | unknown |
| <b>GSM1300070</b> | unknown | unknown | unknown | unknown | unknown | stage I   | unknown | unknown | unknown |
| <b>GSM1300072</b> | unknown | unknown | unknown | unknown | unknown | stage I   | unknown | unknown | unknown |
| <b>GSM1300074</b> | unknown | unknown | unknown | unknown | unknown | stage I   | unknown | unknown | unknown |
| <b>GSM1300076</b> | unknown | unknown | unknown | unknown | unknown | stage I   | unknown | unknown | unknown |
| <b>GSM1300078</b> | unknown | unknown | unknown | unknown | unknown | stage I   | unknown | unknown | unknown |
| <b>GSM1300080</b> | unknown | unknown | unknown | unknown | unknown | stage I   | unknown | unknown | unknown |
| <b>GSM1300084</b> | unknown | unknown | unknown | unknown | unknown | stage I   | unknown | unknown | unknown |
| <b>GSM1300086</b> | unknown | unknown | unknown | unknown | unknown | stage I   | unknown | unknown | unknown |
| <b>GSM1300088</b> | unknown | unknown | unknown | unknown | unknown | stage I   | unknown | unknown | unknown |
| <b>GSM1300090</b> | unknown | unknown | unknown | unknown | unknown | stage I   | unknown | unknown | unknown |
| <b>GSM1300096</b> | unknown | unknown | unknown | unknown | unknown | stage I   | unknown | unknown | unknown |
| <b>GSM1300104</b> | unknown | unknown | unknown | unknown | unknown | stage I   | unknown | unknown | unknown |
| <b>GSM1300106</b> | unknown | unknown | unknown | unknown | unknown | stage I   | unknown | unknown | unknown |
| <b>GSM1300108</b> | unknown | unknown | unknown | unknown | unknown | stage I   | unknown | unknown | unknown |
| <b>GSM1300110</b> | unknown | unknown | unknown | unknown | unknown | stage II  | unknown | unknown | unknown |
| <b>GSM1300112</b> | unknown | unknown | unknown | unknown | unknown | stage II  | unknown | unknown | unknown |
| <b>GSM1300114</b> | unknown | unknown | unknown | unknown | unknown | stage II  | unknown | unknown | unknown |



|                   |         |         |         |         |         |          |         |         |         |
|-------------------|---------|---------|---------|---------|---------|----------|---------|---------|---------|
| <b>GSM1300178</b> | unknown | unknown | unknown | unknown | unknown | stage IV | unknown | unknown | unknown |
| <b>GSM1300180</b> | unknown | unknown | unknown | unknown | unknown | stage IV | unknown | unknown | unknown |
| <b>GSM1300182</b> | unknown | unknown | unknown | unknown | unknown | stage IV | unknown | unknown | unknown |
| <b>GSM1300184</b> | unknown | unknown | unknown | unknown | unknown | stage IV | unknown | unknown | unknown |
| <b>GSM1300186</b> | unknown | unknown | unknown | unknown | unknown | stage IV | unknown | unknown | unknown |
| <b>GSM1300188</b> | unknown | unknown | unknown | unknown | unknown | stage IV | unknown | unknown | unknown |
| <b>GSM1300191</b> | unknown | unknown | unknown | unknown | unknown | stage IV | unknown | unknown | unknown |
| <b>GSM1300193</b> | unknown | unknown | unknown | unknown | unknown | stage IV | unknown | unknown | unknown |
| <b>GSM1300195</b> | unknown | unknown | unknown | unknown | unknown | stage IV | unknown | unknown | unknown |
| <b>GSM1300197</b> | unknown | unknown | unknown | unknown | unknown | stage IV | unknown | unknown | unknown |
| <b>GSM1300199</b> | unknown | unknown | unknown | unknown | unknown | stage IV | unknown | unknown | unknown |
| <b>GSM1300201</b> | unknown | unknown | unknown | unknown | unknown | stage IV | unknown | unknown | unknown |
| <b>GSM993984</b>  | unknown | unknown | 62      | male    | G4      | unknown  | unknown | unknown | unknown |
| <b>GSM993986</b>  | unknown | unknown | 75      | female  | G1      | unknown  | unknown | unknown | unknown |
| <b>GSM993988</b>  | unknown | unknown | 75      | male    | G1      | unknown  | unknown | unknown | unknown |
| <b>GSM993990</b>  | unknown | unknown | 46      | male    | G2      | unknown  | unknown | unknown | unknown |
| <b>GSM993992</b>  | unknown | unknown | 62      | male    | G1      | unknown  | unknown | unknown | unknown |
| <b>GSM993994</b>  | unknown | unknown | 54      | male    | G2      | unknown  | unknown | unknown | unknown |
| <b>GSM993998</b>  | unknown | unknown | 59      | female  | G3      | unknown  | unknown | unknown | unknown |
| <b>GSM994000</b>  | unknown | unknown | 76      | female  | G1      | unknown  | unknown | unknown | unknown |
| <b>GSM994005</b>  | unknown | unknown | 55      | female  | G2      | unknown  | unknown | unknown | unknown |
| <b>GSM994010</b>  | unknown | unknown | 65      | female  | G1      | unknown  | unknown | unknown | unknown |
| <b>GSM994011</b>  | unknown | unknown | 62      | male    | G1      | unknown  | unknown | unknown | unknown |
| <b>GSM994013</b>  | unknown | unknown | 61      | male    | G2      | unknown  | unknown | unknown | unknown |
| <b>GSM994015</b>  | unknown | unknown | 61      | male    | G1      | unknown  | unknown | unknown | unknown |
| <b>GSM994017</b>  | unknown | unknown | 42      | male    | G2      | unknown  | unknown | unknown | unknown |

|                  |         |         |    |        |    |         |         |         |         |
|------------------|---------|---------|----|--------|----|---------|---------|---------|---------|
| <b>GSM994019</b> | unknown | unknown | 65 | female | G3 | unknown | unknown | unknown | unknown |
| <b>GSM994021</b> | unknown | unknown | 64 | female | G2 | unknown | unknown | unknown | unknown |
| <b>GSM994023</b> | unknown | unknown | 77 | female | G2 | unknown | unknown | unknown | unknown |
| <b>GSM994025</b> | unknown | unknown | 65 | male   | G3 | unknown | unknown | unknown | unknown |
| <b>GSM994027</b> | unknown | unknown | 66 | female | G4 | unknown | unknown | unknown | unknown |
| <b>GSM994031</b> | unknown | unknown | 70 | male   | G1 | unknown | unknown | unknown | unknown |
| <b>GSM994033</b> | unknown | unknown | 70 | female | G2 | unknown | unknown | unknown | unknown |
| <b>GSM994035</b> | unknown | unknown | 84 | male   | G1 | unknown | unknown | unknown | unknown |
| <b>GSM994037</b> | unknown | unknown | 78 | female | G2 | unknown | unknown | unknown | unknown |
| <b>GSM994039</b> | unknown | unknown | 76 | male   | G3 | unknown | unknown | unknown | unknown |
| <b>GSM994043</b> | unknown | unknown | 57 | male   | G3 | unknown | unknown | unknown | unknown |
| <b>GSM994045</b> | unknown | unknown | 47 | male   | G2 | unknown | unknown | unknown | unknown |
| <b>GSM994047</b> | unknown | unknown | 53 | male   | G1 | unknown | unknown | unknown | unknown |
| <b>GSM994049</b> | unknown | unknown | 61 | male   | G2 | unknown | unknown | unknown | unknown |
| <b>GSM994051</b> | unknown | unknown | 47 | male   | G3 | unknown | unknown | unknown | unknown |
| <b>GSM994053</b> | unknown | unknown | 68 | male   | G2 | unknown | unknown | unknown | unknown |
| <b>GSM994055</b> | unknown | unknown | 55 | female | G1 | unknown | unknown | unknown | unknown |
| <b>GSM994057</b> | unknown | unknown | 68 | female | G2 | unknown | unknown | unknown | unknown |
| <b>GSM994060</b> | unknown | unknown | 54 | male   | G2 | unknown | unknown | unknown | unknown |
| <b>GSM994061</b> | unknown | unknown | 55 | male   | G3 | unknown | unknown | unknown | unknown |
| <b>GSM994063</b> | unknown | unknown | 60 | female | G1 | unknown | unknown | unknown | unknown |
| <b>GSM994067</b> | unknown | unknown | 62 | mlae   | G1 | unknown | unknown | unknown | unknown |
| <b>GSM994069</b> | unknown | unknown | 59 | female | G3 | unknown | unknown | unknown | unknown |
| <b>GSM994073</b> | unknown | unknown | 78 | male   | G2 | unknown | unknown | unknown | unknown |
| <b>GSM994075</b> | unknown | unknown | 60 | male   | G3 | unknown | unknown | unknown | unknown |
| <b>GSM994077</b> | unknown | unknown | 66 | female | G2 | unknown | unknown | unknown | unknown |

|                  |         |         |    |        |    |         |         |         |         |
|------------------|---------|---------|----|--------|----|---------|---------|---------|---------|
| <b>GSM994079</b> | unknown | unknown | 66 | female | G1 | unknown | unknown | unknown | unknown |
| <b>GSM994081</b> | unknown | unknown | 54 | male   | G3 | unknown | unknown | unknown | unknown |
| <b>GSM994083</b> | unknown | unknown | 79 | male   | G2 | unknown | unknown | unknown | unknown |
| <b>GSM994087</b> | unknown | unknown | 75 | male   | G2 | unknown | unknown | unknown | unknown |
| <b>GSM994089</b> | unknown | unknown | 70 | male   | G2 | unknown | unknown | unknown | unknown |
| <b>GSM994091</b> | unknown | unknown | 56 | male   | G4 | unknown | unknown | unknown | unknown |
| <b>GSM994094</b> | unknown | unknown | 70 | male   | G4 | unknown | unknown | unknown | unknown |
| <b>GSM994099</b> | unknown | unknown | 69 | male   | G2 | unknown | unknown | unknown | unknown |
| <b>GSM994103</b> | unknown | unknown | 70 | female | G3 | unknown | unknown | unknown | unknown |
| <b>GSM994105</b> | unknown | unknown | 67 | female | G3 | unknown | unknown | unknown | unknown |
| <b>GSM994107</b> | unknown | unknown | 72 | male   | G2 | unknown | unknown | unknown | unknown |
| <b>GSM994109</b> | unknown | unknown | 63 | male   | G3 | unknown | unknown | unknown | unknown |
| <b>GSM994111</b> | unknown | unknown | 67 | female | G2 | unknown | unknown | unknown | unknown |
| <b>GSM994115</b> | unknown | unknown | 69 | female | G2 | unknown | unknown | unknown | unknown |
| <b>GSM994117</b> | unknown | unknown | 76 | female | G3 | unknown | unknown | unknown | unknown |
| <b>GSM994119</b> | unknown | unknown | 51 | male   | G1 | unknown | unknown | unknown | unknown |
| <b>GSM994121</b> | unknown | unknown | 55 | male   | G4 | unknown | unknown | unknown | unknown |
| <b>GSM994123</b> | unknown | unknown | 75 | male   | G2 | unknown | unknown | unknown | unknown |
| <b>GSM994125</b> | unknown | unknown | 52 | female | G2 | unknown | unknown | unknown | unknown |
| <b>GSM994127</b> | unknown | unknown | 54 | male   | G1 | unknown | unknown | unknown | unknown |
| <b>GSM994129</b> | unknown | unknown | 61 | male   | G2 | unknown | unknown | unknown | unknown |
| <b>GSM994131</b> | unknown | unknown | 61 | female | G1 | unknown | unknown | unknown | unknown |
| <b>GSM994133</b> | unknown | unknown | 67 | male   | G4 | unknown | unknown | unknown | unknown |
| <b>GSM994137</b> | unknown | unknown | 52 | female | G4 | unknown | unknown | unknown | unknown |
| <b>GSM994141</b> | unknown | unknown | 63 | male   | G2 | unknown | unknown | unknown | unknown |
| <b>GSM994143</b> | unknown | unknown | 62 | male   | G2 | unknown | unknown | unknown | unknown |

|                  |         |         |    |        |    |         |         |         |         |
|------------------|---------|---------|----|--------|----|---------|---------|---------|---------|
| <b>GSM994145</b> | unknown | unknown | 57 | male   | G3 | unknown | unknown | unknown | unknown |
| <b>GSM994147</b> | unknown | unknown | 78 | female | G3 | unknown | unknown | unknown | unknown |
| <b>GSM994149</b> | unknown | unknown | 58 | female | G3 | unknown | unknown | unknown | unknown |
| <b>GSM994151</b> | unknown | unknown | 77 | female | G2 | unknown | unknown | unknown | unknown |
| <b>GSM994153</b> | unknown | unknown | 70 | female | G4 | unknown | unknown | unknown | unknown |
| <b>GSM994155</b> | unknown | unknown | 76 | female | G3 | unknown | unknown | unknown | unknown |
| <b>GSM994158</b> | unknown | unknown | 48 | male   | G2 | unknown | unknown | unknown | unknown |
| <b>GSM994159</b> | unknown | unknown | 64 | male   | G1 | unknown | unknown | unknown | unknown |
| <b>GSM994161</b> | unknown | unknown | 54 | male   | G2 | unknown | unknown | unknown | unknown |
| <b>GSM994165</b> | unknown | unknown | 64 | female | G2 | unknown | unknown | unknown | unknown |
| <b>GSM994169</b> | unknown | unknown | 65 | female | G2 | unknown | unknown | unknown | unknown |
| <b>GSM994171</b> | unknown | unknown | 67 | male   | G3 | unknown | unknown | unknown | unknown |
| <b>GSM994173</b> | unknown | unknown | 46 | female | G2 | unknown | unknown | unknown | unknown |
| <b>GSM994175</b> | unknown | unknown | 67 | female | G2 | unknown | unknown | unknown | unknown |
| <b>GSM994179</b> | unknown | unknown | 59 | female | G3 | unknown | unknown | unknown | unknown |
| <b>GSM994181</b> | unknown | unknown | 78 | male   | G3 | unknown | unknown | unknown | unknown |
| <b>GSM994183</b> | unknown | unknown | 62 | male   | G3 | unknown | unknown | unknown | unknown |
